1           **Spatial and functional links between cellular virological state and**  
2                           **progression of liver fibrosis in chronic hepatitis B**

3   Xiaonan Zhang<sup>1, §</sup>, Danping Liu<sup>3</sup>, Wei Lu<sup>3</sup>, Ye Zheng<sup>4</sup>, Min Wu<sup>1</sup>, Jiahui Ding<sup>2</sup>, Mingzhu  
4   Xu<sup>1</sup>, Xiaohui Zhou<sup>5</sup>, Yanling Feng<sup>4</sup>, Zhanqing Zhang<sup>3, §</sup>, Zhenghong Yuan<sup>1,2, §</sup>

- 5   1. Research Unit, Shanghai Public Health Clinical Center, , Fudan University  
6   2. Key Laboratory of Medical Molecular Virology, Shanghai Medical College, Fudan  
7    University  
8   3. Department of Hepatology, Shanghai Public Health Clinical Center, Fudan  
9    University  
10  4. Department of Clinical Pathology, Shanghai Public Health Clinical Center, Fudan  
11  University  
12  5. Department of laboratory animal, Shanghai Public Health Clinical Center, Fudan  
13  University

14

15 **Key words:** Hepatitis B virus, liver fibrosis, extracellular matrix, in situ hybridization

16

17 **§Correspondence:**

18 Zhenghong Yuan, MD, PhD,  
19 138 Yixueyuan Road, Shanghai, 200032, China  
20 Phone: +86-21-64161928 Fax: +86-21-64227201,  
21 Email: [zh yuan@shmu.edu.cn](mailto:zh yuan@shmu.edu.cn)

22

23 Zhanqing Zhang, MD  
24 Caolang Road 2901, Shanghai 201508, China,  
25 Email: [doctorzzqsphc@163.com](mailto:doctorzzqsphc@163.com)

26

27 Xiaonan Zhang, PhD  
28 Caolang Road 2901, Shanghai 201508, China,  
29 Email: [zhangxiaonan@shphc.org.cn](mailto:zhangxiaonan@shphc.org.cn)

30

31 **Financial Support:**

32

33 National Science and Technology Major project of China (2017ZX10302201001005)

34 National Natural Science Foundation (81671998, 81873962)

35 Shanghai Science and Technology Commission (16411960100)

36

37

38 **Abbreviations:**

39 HBV, Hepatitis B Virus; CHB, chronic hepatitis B; ECM, extracellular matrix; HepPar-1,

40 hepatocyte Paraffin 1; HNF4a, Hepatocyte nuclear factor 4 alpha; hepatitis B e

41 antigen (HBeAg); covalently closed circular DNA (cccDNA); IT, immune tolerant; IA,

42 immune active; ENH, hepatitis B e antigen negative hepatitis; ISH, in situ

43 hybridization; HSC, hepatic stellate cells; HBsAg, Hepatitis B Surface Antigen; AgNOR,

44 argyrophilic nucleolar organizer region, IP-10, Interferon gamma-induced protein 10.

45

46

47 **Abstract**

48 Chronic Hepatitis B Virus (HBV) infection is strongly associated with the progression of  
49 liver fibrosis, cirrhosis and hepatocellular carcinoma. Despite intensive study, the  
50 detailed mechanisms leading to HBV induced liver disease have not been fully  
51 elucidated. Previously, we reported a mosaic distribution of viral antigens and nucleic  
52 acids at single-cell level in liver tissues of chronic hepatitis B (CHB) patients and  
53 proposed a ‘three-stage model’ of HBV infection in vivo. Here, we explored whether  
54 the different stages at cellular level is functionally linked with fibrogenesis. We  
55 observed a tight spatial relationship between the invasion of collagen fibers and  
56 transitions from S-rich to DNA-rich stage. While S-rich cells mainly localized within  
57 minimally fibrotic tissue, DNA-rich cells were often closely surrounded by a milieu of  
58 stiffened extracellular matrix (ECM). cDNA microarray and subsequent validation  
59 analyses revealed that S-rich cells manifested elevated ribosomal proteins and  
60 oxidative phosphorylation genes in a disease phase-dependent manner. On the other  
61 hand, DNA-rich cells exhibited gradually deteriorated expression of hepatocyte-  
62 specific antigen and transcriptional regulator in parallel with the progression of hepatic  
63 fibrosis. Finally, during fibrogenesis, inflammatory genes such as IP-10 were found to  
64 be expressed in both portal infiltrated cells and surrounding parenchymal cells which  
65 resulted in suppressed antigen expression. Taken together, we propose that liver  
66 inflammation and accompanying fibrogenesis is spatially and functionally linked with  
67 the transition of virological stages at cellular level. These transitions occur possibly due  
68 to an altered hepatocyte transcription profile in response to a transformed ECM

69 environment. The collective viral and host activities shape the histological alterations

70 and progression of liver disease during CHB infection. (262 words)

71

72

## 73 **Introduction**

74 Globally, hepatitis B virus (HBV) chronically infects over 240 million people. Patients  
75 with chronic hepatitis B (CHB) often develop liver fibrosis, cirrhosis and hepatocellular  
76 carcinoma, which results in over 780,000 deaths annually(1). Currently available  
77 antivirals such as nucleot(s)ide analogs and pegylated interferon can effectively control  
78 viremia and lower the risk of CHB related liver disease, but sustained off-treatment  
79 responses are still rare(2). Novel therapies are in development with the goal of  
80 ‘functional cure’ which is defined by the loss of Hepatitis B Surface Antigen (HBsAg),  
81 hopefully together with appearance anti-HBsAg and tight immune control of  
82 intrahepatic HBV covalently closed circular DNA (cccDNA).

83 Among the challenges on the way to HBV cure, the limited knowledge on the  
84 intrahepatic virological and immunological events in the context of liver pathological  
85 changes during the course of CHB infection represents a major one. Although the  
86 natural history of CHB is quite complex and variable among individuals, it is commonly  
87 regarded as consisting of four phases (3, 4), i.e., immune tolerant (IT), immune  
88 clearance or immune active (IA), non/low-replicative or HBV carrier, and hepatitis B e  
89 antigen negative hepatitis (ENH). These phases have been defined by specific  
90 biochemical, serological and virological parameters, including serum ALT levels,  
91 hepatitis B e antigen (HBeAg) serostatus, and serum viral load. During the natural  
92 course of CHB infection, hepatic inflammation and accompanying liver fibrosis often  
93 develop, which is much more prevalent and severe in IA and ENH phase.

94 Liver fibrosis is the process of excessive accumulation of extracellular matrix (ECM)  
95 proteins, mostly collagen, which occurs in most types of chronic liver diseases. In CHB,  
96 the fibrogenesis, which is considered as a wound-healing process, occurs immediately  
97 after liver injury initiated by host immune response against active viral replication  
98 and/or antigen production. The hepatic stellate cells (HSCs) are widely recognized as  
99 the main collagen-producing cells although other cell types such as portal  
100 myofibroblasts may also play a role (5). The mechanisms leading to HSC activation and  
101 collagen production have been extensively studied in a wide array of experimental  
102 models. However, few studies looked into the interplay between fibrogenesis and viral  
103 replication at the histological level in clinical CHB infections.

104 In this study, by utilizing a pre-established in situ hybridization (ISH) assay of HBV DNA  
105 in conjunction with detection of key viral/host antigens and collagen fibers, we aimed  
106 to explore the connection between virological events and active collagen deposition  
107 at single-cell resolution. A triple staining protocol (HBV DNA-HBsAg-Sirius red) was  
108 used to survey a large number of CHB cases and we found a prominent histological  
109 association between active deposition of collagen fibers and changes of virological  
110 stages. Specifically, DNA-rich cells were more frequently found adjacent to active  
111 fibrosis while S-rich cells mostly resided in less fibrotic region. Expression profiling and  
112 qRT-PCR analysis revealed that S-rich cells were associated with elevated ribosomal  
113 proteins and mitochondrial respiratory gene expression in IT and carrier phase. Similar  
114 results were also found in HBsAg transgenic mice. By contrast, DNA-rich cells often  
115 exhibited weakened expression of hepatocyte-specific protein and transcription factor,

116 e.g. HepPar-1 and HNF4a and in some cases coincided with vacuolar degeneration.

117 Finally, inflammatory gene expression such as IP-10 is found in both infiltrated and

118 parenchymal cells which resulted in suppressed viral antigen expression.

119

## 120 **Material and Methods**

### 121 **Patients and specimens**

122 A total of 230 chronic hepatitis B patients were included in this study. Their clinical

123 information and pertained experiments were listed in Supplementary Table 1. The

124 percutaneous liver biopsy procedure was performed using needles with 1 mm inner

125 diameter. The liver specimens obtained were usually >1.2 cm long and separated in

126 two parts and preserved differently (one with 10% neutral formalin and the other with

127 RNAlater). The blood samples from enrolled patients were tested for hepatitis B virus

128 surface antigen (HBsAg) and hepatitis B virus e antigen (HBeAg) by Abbott AXSYM

129 HBsAg (normal: 0–2S/N) and HBeAg 2.0 MEIA kit (normal: 0–1.0S/CO) (Abbott

130 Laboratories) and for viral load by HBV DNA quantitative real-time PCR kit (Qiagen,

131 Shenzhen, China).

132

### 133 **Mice, Antibodies and reagents**

134 The HBsAg transgenic mice were purchased from the Jackson laboratory (Alb-PSX line

135 107-5D) and housed in specific pathogen free environment. They were kept on light-

136 dark cycle and provided ad libitum access to water and standard diet unless otherwise  
137 stated. Eight-week-old male transgenic mice and non-transgenic littermates were  
138 selected for experiments. Mouse monoclonal antibody to HBsAg (clone OT1D3),  
139 rabbit monoclonal antibody to type I Collagen (clone EP236), mouse monoclonal  
140 antibody to HepPar-1 (clone OCH1E5) were purchased from ZSbio (Beijing, China).  
141 Alexa Fluor 488 labeled goat-anti-rabbit IgG and Alexa fluor 555 labeled donkey-anti-  
142 mouse IgG were from Thermo Fisher (USA). mouse anti-HNF4a (H1415) was purchased  
143 from R&D systems. Rabbit monoclonal antibody to COX IV (#4844) was from Cell  
144 signaling. Silver nitrate (85230) was purchased from Fluka, Gelatin (9764) was from  
145 Amresco.

146

#### 147 **HBV DNA, viral or host antigen and Sirius Red triple staining**

148 The protocol for in situ hybridization of HBV DNA in formalin-fixed paraffin embedded  
149 (FFPE) sections of liver biopsies were performed as described previously (6) using a  
150 pan-genotype probeset (genotype A-D, VF6-20095, Affymetrix, CA. USA). Sections  
151 were stained with NBT (Nitroblue tetrazolium) and BCIP (1,5-bromo-4-chloro-3-  
152 indolyl-phosphate, Roche, Switzerland) in developing solution at 37 °C for 2 hrs.  
153 Sections were then immuno-stained with antibody against HBsAg or HNF4a, at 4 °C  
154 overnight followed by HRP labeled secondary antibody (Leica BOND) and DAB (3,3'-  
155 Diaminobenzidine) or AEC (aminoethyl carbazole) development. Sections were finally  
156 counterstain with Sirius red, dehydrated and mounted with neutral mounting medium



157 (ZS-bio, China).

158

### 159 **Single and double in situ hybridization of RNA and DNA**

160 The method for ISH of IP-10 mRNA was similar to that of HBV DNA except that all the  
161 solutions used before hybridization step were pre-treated with diethyl pyrocarbonate.  
162 Signal was developed with either NBT/BCIP or fast red. For double ISH of HBV DNA and  
163 IP-10 mRNA, IP-10 signal was first developed using NBT/BCIP followed by inactivation  
164 of the label probe (6-AP) with AP stop QT for 30min at room temperature and then  
165 incubated with the other label probe (1-AP) for 15min at 40 degree. After washing,  
166 signal was developed with INT (p-Indonitrotetrazolium, Sigma-Aldrich) and BCIP (1,5-  
167 bromo-4-chlooro-3-indolyl-phosphate, Roche, Switzerland).

### 168 **Combined FISH and immunofluorescence staining**

169 Cryosections were used for HBV DNA FISH. Briefly, sections were baked at 37°C for 5  
170 min followed by a 5 min fixation with 3.7% neutral formalin. After protease digestion  
171 for 10min at 37°C, sections were refixed for 5min and hybridized with HBV DNA  
172 probeset. After bDNA amplification, FISH signal was developed with Fast Red according  
173 to the protocol of Affymetrix tissue kit. Immuno-staining of type I collagen were then  
174 performed at 4°C overnight followed by incubation with AF488 labeled goat-anti-  
175 rabbit antibody (Thermo). Sections were finally counterstained with Hoechst 33342  
176 and mounted with Dako fluorescent mounting medium (S3023).

177 **AgNOR staining and immunohistochemistry of HBsAg**

178 The AgNOR staining of nucleoli was performed essentially as described(7). FFPE  
179 sections were routinely dewaxed through xylene and graded alcohol to distilled water.  
180 Slides were then immersed in 0.01M sodium citrate buffer pH 6.0 and boiled at 120°C  
181 for 20min in a wet autoclave. After cooling down and washing, slides were incubated  
182 with fresh prepared 33% silver nitrate in a solution containing 0.6% gelatin and 0.33%  
183 formic acid prepared with ultrapure water. Slides were stained at 37°C for 13min. The  
184 slides were then washed extensively with distilled water and blocked with 10% FBS in  
185 PBS. Anti-HBsAg was incubated at 4°C overnight followed by HRP labeled secondary  
186 antibody and AEC staining.

187 **cDNA microarray and quantitative RT-PCR analysis**

188 A total of 25 samples were included in the microarray analysis. We included samples  
189 with the following criteria, IT phase (n=8), HBeAg positive, HBV DNA >10<sup>7</sup> copy/ml,  
190 G score 0-2, S score 0-1, ALT<50 IU/L; IA phase (n=6), HBeAg positive, HBV DNA >10<sup>5</sup>  
191 copy/ml, G score 0-2, S score 0-1 ALT>80 IU/L; carrier phase (n=5) , HBeAg negative,  
192 HBV DNA< 10<sup>5</sup> copy/ml, G score 0-1, S score 0-1, ALT <60 IU/L; normal control (n=6),  
193 negative for HBV, HCV and HIV, normal serum biochemical and metabolic markers, no  
194 auto-immune antibodies and normal liver histology. The raw-data used in this  
195 publication had been deposited in NCBI's Gene Expression Omnibus and are accessible  
196 through accession number GSE83148. CEL files were produced by Affymetrix U133A  
197 microarray analysis. Probe set signals were normalized and summarized by the robust

198 multi-array average algorithm to adjust different batch effects. Unsupervised  
199 hierarchical clustering was performed with Cluster 3.0 and shown with Treeview.  
200 Principal component analysis (PCA) was performed using the FactoMineR package in  
201 R and plotted with factoextra.

202 Further validation of differential genes was carried out in additional 42 liver biopsy  
203 samples (8 carrier, 23 IT, 11 IA with inclusion criteria similar to microarray analysis). To  
204 better quantify the changes in ribosomal and oxidative phosphorylation genes, we  
205 utilized a panel of house-keeping genes as internal controls (GAPDH, HMBS, HPRT1  
206 and UBC) as suggested by a previous publication(8). Based on the Ct values of this  
207 internal control panel, the relative value of target gene expression was calculated in  
208 qBASE(9). qRT-PCR analysis of transgenic mice liver was performed similarly except  
209 mouse GAPDH and HPRT1 genes were used as internal control.

#### 210 **Image acquisition and processing and availability**

211 Light microscopy observation and image acquisition were mostly performed on a  
212 Nikon eclipse Ci microscope equipped with a CCD (Oplenic) camera. Whole-section  
213 scanning was also performed on part of the slides using Panoramic 250 scanner  
214 (3DHISTECH). Fluorescent images were captured on an Olympus IX81 inverted wide-  
215 field fluorescence microscope with a sCMOS camera (Prime 95B, Photometrix) or a  
216 Leica SP5 confocal microscope. Fully digitalized whole-section images and other  
217 light/fluorescent microscope images accompanied by basic clinical parameters were  
218 compiled and uploaded onto [www.hepb-atlas.com](http://www.hepb-atlas.com) .

219 **Statistics**

220 Graphpad Prism 6.0 was used for most statistical analyses. One-way ANOVA test was  
221 used for qRT-PCR data. Student's t test was used for analyses in HBsAg transgenic mice.

222 The in situ hybridization and other combined staining results were examined by two  
223 independent pathologists.

224 **Study approval**

225 Written informed consent was received from participants prior to inclusion of this  
226 study and collection of clinical samples. The study conforms to the ethical guidelines  
227 of the 1975 Declaration of Helsinki and was approved by the ethics committee of  
228 Shanghai Public Health Clinical Center. The experiments on transgenic mice were  
229 approved by the laboratory animal ethics committee in Shanghai Public Health Clinical  
230 Center.

231

232

233

234 **Results**

235 **Histological link between S-rich, DNA-rich stage transitions and the development of**  
236 **liver fibrosis**

237 Based on the pre-established HBV DNA ISH assay, we further developed a triple  
238 staining protocol, i.e., HBV DNA-HBsAg-Sirius red staining. The purple-blue (HBV DNA),  
239 brown (HBsAg) and red (Sirius red) combination generated high color-contrast, easy-  
240 to-interpret results (Figure 1). Using this assay, we were able to inspect the histological  
241 relationship between collagen fiber and viral DNA/antigen. In accordance with our  
242 previous report, HBV DNA and HBsAg showed a mutually exclusive pattern (Figure 1.  
243 A-F). In addition, S-rich cells were mostly found within minimally fibrotic regions in  
244 HBV carriers and immune-tolerant patients (Figure 1. A-B, Supplementary Figure 1. G-  
245 H, 2. A-B). By contrast, DNA-rich cells were frequently surrounded by condensed  
246 collagen fibers (Figure 1. C-D, Supplementary Figure 1. A-F, 2. C-F, 3. A-F) which were  
247 rarely seen within clustered S-rich cells (Figure 1. E). Indeed, we also observed that S-  
248 rich to DNA-rich transitions were frequently found within the pseudolobules resulting  
249 from excessive fibrosis (Figure 1.D, G-H, Supplementary Figure 1 A-D). In addition,  
250 DNA-rich cells were often found as being trapped by the growing net of collagen fibers  
251 (Figure 1. G-H, Supplementary Figure 1 D, F, 3. A-F). Furthermore, in a subset of  
252 cases, DNA-rich cells exhibited significant vacuolar degeneration (cellular swelling) but  
253 very few S-rich cells showed similar manifestations (Supplementary Figure 2 E-F,  
254 arrowhead).

255 To further validate the spatial relationship between collagen and DNA/S positive cells,  
256 we performed fluorescent co-staining of type I collagen, the main component of  
257 fibrotic ECM, and HBsAg (Figure 2. A-C) or HBV DNA using fast red as chromogen  
258 (Figure 2. D-E). Similarly, we observed that, other than the portal area, clusters of  
259 HBsAg rich cells had low level of surrounding type I collagen (Figure 2. A-C,  
260 Supplementary Figure 4), which was particularly significant within the cluster. On the  
261 other hand, DNA-rich cells were most often seen near the fibrotic portal area, which  
262 is full of infiltrated cells (Figure 2. D, Supplementary Figure 5, note the large clumps of  
263 nuclei). These DNA positive cells were being progressively besieged by collagen fibers  
264 (Figure 2. E, Supplementary Figure 5). Collectively, these findings strongly suggested  
265 that the S-rich and DNA-rich state is associated with its ECM environment.

266 **Hepatic accumulation of viral antigens induces ribosomal protein and oxidation**  
267 **phosphorylation gene expression.**

268 To further inquire the underlying mechanism leading to the ECM modulated cellular  
269 state, we took advantage of the microarray dataset generated from liver biopsies from  
270 CHB patients (122 cases in total), which had been previously analyzed from various  
271 aspects(10-12). Since the included samples spanned all four phases and various degree  
272 of liver inflammation and fibrosis, the differential genes recovered were mostly related  
273 to fibrogenesis and immune-related pathways. We reasoned that in order to reveal  
274 host genes directly modulated by viral replication or expression in the context of  
275 overwhelming secondary inflammatory fibrosis related genes, we needed to stratify

276 the cohort by restricting the level of liver pathologies. As a result, with these  
277 restrictions (see material and methods for inclusion criteria) we only included 8 cases  
278 of IT phase, 6 cases of IA phase, 5 cases of carrier phase together with 6 normal  
279 samples (total n=25). We then re-analyzed the microarray data with these included  
280 samples. Unsupervised hierarchical clustering analysis showed that these four types  
281 of samples can be separated without disease phase information (Figure 3. A). Similarly,  
282 principal component analysis (PCA) also showed a clear distinction among these four  
283 groups (Figure 3. B). We then performed pathway enrichment analysis on the  
284 differential genes when samples were divided into these four groups (Supplementary  
285 Figure 6). Interestingly, apart from the enrichment of immune-related pathways such  
286 as Adhesion Molecules on Lymphocytes, Monocytes/Neutrophils and its surface  
287 molecules, Adhesion and diapedesis of lymphocytes, Chemokine signaling pathways  
288 etc, we unexpectedly found significant enrichment of ribosome pathway  
289 (Supplementary Figure 6, 39.77% enrichment rate,  $p < 0.0001$ ) and oxidative  
290 phosphorylation pathway (9.7% enrichment rate,  $p < 0.0001$ ). Further analysis of the  
291 differential genes within the ribosome pathway identified ribosomal proteins (RPL11,  
292 21, 24 etc) and mitochondrial ribosomal proteins (MRPS33, MRPS14, MRPL40 etc)  
293 whereas differential genes within oxidative phosphorylation pathway were mainly  
294 subunits of ATP Synthase (ATP5G1, ATP5G2 etc), Cytochrome C Oxidase (COX6A1,  
295 COX7C), ubiquinone oxidoreductase (NDUFA3, NDUFA4) and succinate dehydrogenase  
296 complex (SDHC, see Supplementary Table 2). More interestingly, the differential genes  
297 within these two pathways showed an astoundingly unanimous trend among these

298 four groups. They were almost all up-regulated in IT and carrier group and mostly  
299 down-regulated in IA group (Figure 3.C right panel). By contrast, immune-related genes  
300 exhibited an opposite trend with higher expression only in IA group (Figure 3.C left  
301 panel). These results indicated that stratification of samples effectively controlled the  
302 overwhelming fibrogenesis related genes and revealed genes that are directly  
303 perturbed by viral factors. In addition, since liver tissue in carrier phase accumulates  
304 high level of viral antigens such as HBsAg but not viral DNA, the up-regulated ribosomal  
305 and oxidative phosphorylation genes were most likely caused by viral antigens.

306 We further confirmed the differential genes by qRT-PCR in additional 42 samples with  
307 similar inclusion criteria (Supplementary Figure 7). Interestingly, ribosomal and  
308 mitochondrial respiratory genes showed much higher elevation in three samples of  
309 carrier phase. Pathological changes of 'ground glass morphology' and 'enlarged nuclei  
310 and intensive hematoxylin staining' were all documented in these samples (data not  
311 shown). In addition, in order to further prove that HBsAg accumulation is responsible  
312 for these global changes in ribosomal and mitochondrial activity, we performed  
313 immunofluorescent co-staining of COX IV, a key component of mitochondrial  
314 respiratory chain, and HBsAg. Indeed, higher intensity of COX IV signal was found in S-  
315 rich cells in carrier and IT phase but not in IA phase consistent with microarray data  
316 (Supplementary Figure 8A). To evaluate the ribosomal contents within S-rich cells, we  
317 performed AgNOR (argyrophilic nucleolar organizer region) staining, which is a silver  
318 deposition assay preferably on argyrophilic nucleolar organizer-associated proteins  
319 located mainly in nucleoli. S-rich cells were visualized using AEC (aminoethyl carbazole)



320 as chromogen following AgNOR staining. Indeed, the S-rich cells in sections of IT and  
321 carrier phase exhibited multiple enlarged nucleoli compared with surrounding S  
322 negative cells (Supplementary Figure 8B). No obvious enlargement or multiplication of  
323 nucleoli was found in IA and normal samples.

324 Finally, we extended our analysis in an HBsAg transgenic mice model (Alb-PSX 107-5D,  
325 Jackson Laboratory). These mice accumulate high amount of intrahepatic large surface  
326 antigen and were reported to develop hepatocellular neoplasia(13). We first  
327 checked the serum HBsAg in 8-week-old transgenic and non-transgenic littermates  
328 (Supplementary Figure 9A) and then measure the level of blood cholesterol, glucose,  
329 high-density lipoprotein (HDL) cholesterol and triglyceride after overnight fasting.  
330 Interestingly, S positive transgenic mice exhibited significantly lowered levels of these  
331 metabolism markers (Supplementary Figure 9B-D, F,  $p < 0.001$ , student's t test). In  
332 addition, transgenic mice exhibited significantly higher body weight compared with  
333 non-transgenic littermates (Supplementary Figure 9E,  $p < 0.05$ , student's t test). These  
334 results clearly indicated that hepatic accumulation of surface antigen modulated basal  
335 metabolism in mice. We went on the measure the level of ribosomal and  
336 mitochondrial gene that had been observed to be perturbed by HBV infection. We  
337 found, however, that only mitochondrial genes such as COX6A1, NDUFC1 and ATP5G2  
338 were up-regulated in transgenic mice whereas no obvious up-regulation of ribosomal  
339 proteins was found (Supplementary Figure 10). These results indicated that the  
340 observed effect in HBV carrier and IT phase might be the concerted action of HBsAg  
341 and other antigens, such as HBx. Nevertheless, these experiments strongly suggested

342 that viral antigen expression can induce host ribosomal and mitochondrial gene  
343 expression in immune-quiescent phases (IT and carrier).

344

345 **Weakened expression of hepatocyte-specific protein and loss of HNF4a in DNA-rich**  
346 **cells in a fibrosis dependent manner.**

347 Having shown that S-rich cells exhibited a phase dependent up-regulation of the most  
348 essential genes in host metabolism and protein synthesis, we went on to ask whether  
349 DNA-rich cells also underwent physiological changes. Considering the proximity of  
350 DNA-rich cells to stiffened ECM milieu, we reasoned that these hepatocytes might  
351 have a deteriorated hepatocellular function. We tested this by co-staining of HBV DNA  
352 and HepPar-1, a widely used hepatocyte-specific marker, which is a urea cycle enzyme  
353 (carbamoyl phosphate synthetase 1, CPS1) resided in mitochondria(14). We observed  
354 that DNA-rich cells showed a relatively lower expression of HepPar-1 in mildly fibrotic  
355 samples compared with DNA-negative cells (Figure 4 A-B, fibrotic stage S1), and the  
356 discrepancy became more obvious in sections of higher fibrotic stages (Figure 4 C-D,  
357 S2, E-F, S3, G-H, S4). Indeed, in samples with S score of 4, a high proportion of DNA-  
358 rich cells no longer express detectable HepPar-1 (Figure 4 G-H). Interestingly, it can  
359 also be observed that some HepPar-1 weak cells were progressively being trapped into  
360 collagen fibers and some of them still contain residual HBV DNA (Figure 4 D, F, white  
361 arrowhead). This indicates that during fibrogenesis, some hepatocytes undergo  
362 degeneration due to the physical capture by growing collagen fibers. As they finally

363 develop into pseudolobules, a significant portion of hepatocytes is ‘buried’ into and  
364 become part of fibrotic tissues.

365 Accumulating evidence has shown that the stiffness of ECM played a key role in the  
366 process of HSC and LSEC (liver sinusoidal endothelial cell) activation(15), which  
367 contribute to the growing collagen fibers and angiogenesis. In the meantime, the ECM  
368 rigidity also profoundly affects hepatocyte function(16). Desai et al reported that  
369 fibrotic level of matrix rigidity caused a significant decrease of key hepatic transcription  
370 factors such as HNF4a. We thus went on to test the relationship between HBV DNA  
371 and HNF4a at single-cell level. Indeed, in DNA positive cells, we also found a gradual  
372 decline of nuclear HNF4a. With higher levels of fibrosis, this trend became more  
373 significant (Figure 5 A-B, S1, C-D, S2, E-F, S3, G-H, S4). Again, in some samples, we  
374 observed vacuolar degeneration in DNA-rich cells (Figure 5 B, D). Collectively, these  
375 results indicated that DNA-rich cells exhibited a gradual loss of hepatocyte-specific  
376 proteins and key transcription factors for hepatocyte identity during the progression  
377 of liver fibrosis.

378

379 **The spatial relationship between hepatic inflammatory gene expression and HBsAg,**  
380 **HBV DNA accumulation**

381 The liver inflammation is inseparable from fibrogenesis during the development of  
382 CHB-related liver disease. We next tried to probe the spatial relationship among

383 inflammatory gene expression, viral DNA/antigen and the collagen fibers. We chose  
384 IP-10 as an example due to its relatively robust and universal induction in many cell  
385 types. We first examined the expression of IP-10 in the context of HBsAg  
386 (Supplementary Figure 11 A-D) and collagen fibers (Supplementary Figure 11 E-H).  
387 Indeed, IP-10 was not only expressed in infiltrated cells, but also in parenchymal cells  
388 (Supplementary Figure 11 C-D, G-H, arrowhead). The induction of IP-10 was closely  
389 related to the pseudolobule developed by the growth of collagen fibers  
390 (Supplementary Figure 11 E-H, Supplementary Figure 12 arrowhead). In addition, IP-  
391 10 signal was also seen in S positive cells, although the level of HBsAg was much lower  
392 than that in IP-10 negative cells (Supplementary Figure 11. C, G, Supplementary Figure  
393 13 arrowhead), suggesting that these cells were also influenced by inflammation.  
394 Interestingly, IP-10 was found not to be restricted in IA patients, as it can be observed  
395 in some IT patients as exemplified in one particular case with ALT value of 41 IU/L  
396 (Supplementary Figure 12, 13). This reflected the limitations of disease phase  
397 categorization solely based on blood tests.

398 We next attempted to perform a triple staining, in which IP-10 signal was developed  
399 by NBT/BCIP (blue-purple), HBV DNA was then developed by INT/BCIP (yellow) and  
400 HBsAg was finally stained using AEC (red). Again, we found that IP-10 high cells were  
401 mostly devoid of S antigen (Figure 6 A-B) although these two groups of cells seemed  
402 to be in close proximity. In addition, DNA-rich cells were observed next to S-rich and  
403 IP-10 positive cells (Figure 6 C) which hinted that active transitions were taking place  
404 during chronic hepatitis. Nevertheless, IP-10 positive cells could also retain significant

405 HBV DNA in some cases (Figure 6. D-F, arrowhead), which usually resided in the  
406 interface between infiltrated leukocytes and DNA-rich hepatocytes near the portal  
407 area. Collectively, these observations suggested that inflammatory genes such as IP-  
408 10 can be induced in parenchymal and non-parenchymal cells in parallel with liver  
409 fibrogenesis. The induction of inflammation could take place without noticeable  
410 elevation of serum ALT levels. The parenchymal induction of IP-10 could lead to a  
411 decrease of viral antigen expression and may correlate with single-cell stage transitions.

412

## 413 **Discussion**

### 414 **The current knowledge on CHB associated liver fibrosis**

415 HBV infection is one of the major causes of liver fibrosis globally. CHB induced liver  
416 fibrosis is manifested by the excessive accumulation of ECM proteins, including  
417 collagen, and is believed to be a wound-healing response initiated by chronic  
418 inflammation against viral infection. Activation of HSCs and their production of ECM  
419 proteins have been found to be the major cause of the altered extracellular matrix  
420 environment. Effective antiviral therapy for CHB has proven to stall or even reverse the  
421 progression of liver fibrosis(2). Despite all the progress, information is still lacking  
422 regarding the pathophysiological details of HBV induced fibrogenesis. In particular,  
423 considering the complex single-cell behavior of HBV(6), a more detailed observation  
424 of viral and cellular activities in a histological context is required.

425 In this study, we unexpectedly found a close spatial relationship between the single-  
426 cell virological state, i.e., S-rich and DNA-rich state, and the deposition of collagen  
427 fibers. In carriers and IT patients, clusters of S-rich cells were usually located in  
428 minimally fibrotic tissues, whereas in IA patients, DNA-rich cells, were more frequently  
429 found to be spatially related to the growing collagen fibers compared to S-rich cells.  
430 This led us to speculate that the S-rich, DNA-rich transitions might be the result of an  
431 altered cellular state directly caused by the changes in the extracellular milieu.

432

433 **Accumulation of viral antigen changes hepatocellular physiology**

434 In order to look into the detailed mechanism leading to the aforementioned  
435 phenomenon, we utilized a previously published cDNA microarray dataset of CHB liver  
436 biopsies. Re-analysis of the dataset after filtering confounding factors such as excessive  
437 inflammation and fibrosis revealed some essential genes involved in pathways such as  
438 ribosome and mitochondria respiratory chain to be up-regulated in carrier and IT  
439 phase but not in IA phase. These results suggested that the over-produced viral antigen  
440 caused this effect which could be subverted by active inflammation. Indeed, this is in  
441 line with the typical 'ground-glass morphology' that is prevalent in HBV carriers and IT  
442 patients but not in IA phase (17). In an HBsAg transgenic mice model, in which the  
443 'ground-glass morphology' was recapitulated(18), only oxidative phosphorylation  
444 genes were upregulated suggesting that apart from surface antigen, other viral  
445 antigens might also play a role. The expression of HBx within hepatocytes would very  
446 likely contribute to the overall change of cellular transcriptome since high level of HBx  
447 in mice could lead to changes to hepatocellular histology such as enlarged,  
448 hyperchromatic nuclei(19) which are also frequently observed in HBV carriers.  
449 Unfortunately, due to the lack of a reliable HBx antibody for immunohistochemistry,  
450 we are unable to directly test this hypothesis in CHB patients. In addition, the HBsAg  
451 transgenic mice exhibited a significantly altered metabolic profile such as lower level  
452 of triglyceride and high-density lipoprotein (HDL) cholesterol. Notably, this trend was  
453 also found in a large-scale cross-sectional study of HBV infected individuals(20). These  
454 evidences highlighted the clinical relevance of HBsAg modulated host metabolism

455 which might be directly linked to the perturbed transcriptional profile.

456 **The stiffness of extracellular matrix shapes parenchymal cell activity in the liver**

457 **lobule**

458 The accumulation of ECM was once thought to be merely the result of chronic injury  
459 during liver fibrosis. However, recent progress has shown that ECM provides  
460 instrumental biochemical and biomechanical cues that influence both parenchymal  
461 and non-parenchymal cells(21). Indeed, artificial matrix whose stiffness can be fine-  
462 tuned has been shown to dictate the migration and activation of HSCs and LSECs,  
463 which in turn remodeled the surrounding matrix(15). Also, fibrotic level of matrix  
464 stiffness had a profound effect on cytoskeletal tension of primary hepatocytes and  
465 hence significantly inhibited their functions, which was at least in part caused by the  
466 down-regulation of HNF4a, a key regulator of hepatocyte identity(16). As our in situ  
467 observations showed that DNA-rich cells were frequently surrounded by condensed  
468 ECM, we reasoned that these cells might exhibit degenerated hepatocyte function. In  
469 agreement with this notion, DNA-rich cells were found to express lower level of  
470 hepatocyte-specific protein (HepPar-1) and the key transcriptional regulator, HNF4a.  
471 The extent of this down-regulation was proportional to the stage of liver fibrosis. In  
472 addition, in some of the patients we also observed vacuolar degeneration (cellular  
473 swelling), which is the result of intracytoplasmic accumulation of water due to the  
474 incapacity to maintain ionic and fluid homeostasis, in DNA-rich cells but rarely in S-rich  
475 cells. This also suggested that DNA-rich cells exhibited cellular dysfunction possibly as



476 a result of an unfavorable ECM milieu. Thus, we propose that the DNA-rich state may  
477 be the direct consequence of the degenerated hepatocellular status under the  
478 influence of the altered extracellular environment.

#### 479 **Conclusion and clinical implications**

480 Based on the observations in this study, we propose an updated model of HBV life-  
481 cycle in a histological context, in which inflammation and fibrogenesis are incorporated  
482 (Figure 7). In immune quiescent phase of the CHB infection (equivalent to fibrosis stage  
483 0-1), the majority of the HBV infected cells exhibited an S-rich state. The infected cells  
484 harbor high level of viral antigens such as HBsAg and possibly HBx which boost some  
485 of the essential cellular activities such as protein synthesis and energy conversion.  
486 Spontaneous transition into DNA-rich state is initiated due to the loss of immune-  
487 quiescence and subsequent activation of HSCs and deposition of collagen fibers  
488 (equivalent to fibrosis stage 2-3). The infiltration of immune cells and resulting  
489 secretion of inflammatory mediators trigger hepatocellular inflammation gene  
490 expression and suppress the expression of viral antigens and might also contribute to  
491 S-rich to DNA-rich transition. The stiffened ECM milieu and associated inflammation  
492 inhibited the major hepatocellular functions by down-regulating key transcription  
493 factors such as HNF4a. Further accumulation of rigid ECM (pseudolobule formation)  
494 around HBV infected hepatocytes eventually leads to the deterioration of these cells,  
495 part of which are finally immersed into the fibrotic tissue (equivalent to fibrosis stage  
496 4). As a result of inflammation and advanced fibrosis, a significant number of HBV

497 positive cells convert to the latent stage with minimal viral expression and replication.

498 The natural history of CHB is complex and non-uniform among individuals.

499 Nevertheless, it is commonly categorized into four phases(3, 4). Recent studies

500 challenged this phase classification(22), pointing to the validity of the term ‘immune

501 tolerant’. The latest guideline for CHB issued by the European Association for the

502 Study of the liver (EASL) has thus changed the nomenclature of these four phases

503 although the major criteria for classification remained the same(23). Though the

504 patients in IT phase in general have much lower fibrosis scores, a substantial portion

505 of them showed significant fibrosis(24, 25). It is tempting to speculate that the extent

506 of HBV DNA ISH signal in comparison with HBsAg IHC signal would also be indicative

507 of further progression of liver disease considering the close ties between fibrogenesis

508 and the DNA-rich state. If this postulate is proven correct in further large-scale

509 quantitative study, a more precise evaluation of clinical phase can be performed and

510 proactive antiviral therapy might have clinical benefit for this subset of ‘tolerant’

511 patients.

512 This study also has its limitations. A thorough, quantitative analysis is needed and is

513 underway to validate the statistical link between DNA-rich state and the progression

514 of liver fibrosis. Also, the details of the inflammatory response within the liver lobule

515 should also be further explored, possibly by the state-of-the-art technologies of single-

516 cell analysis(26-28), in order to define the major effectors of liver damage and viral

517 clearance. Nevertheless, the updated three-stage model would form a cohesive

518 framework for understanding the intimate relationships between viral and histological  
519 activities during chronic hepatitis B infection and provide new clues for the  
520 development of next-generation therapeutics. In addition, the major images created  
521 in this study have been deposited in [www.hepb-atlas.com](http://www.hepb-atlas.com) which serves as a resource  
522 for basic and clinical studies.

523

524

525

526 **Disclosures:** The authors declare that no conflict of interest exists.

527 **Acknowledgement**

528 We thank Mrs Zhuying Chen and Xiurong Peng for excellent technical assistance and  
529 dedicated work in compilation of clinical information.

530

## 531 Reference

- 532 1. WHO. Guidelines for the prevention, care and treatment of persons with chronic hepatitis B  
533 infection., 2015.
- 534 2. Sarin SK, Kumar M, Lau GK, Abbas Z, Chan HL, Chen CJ, Chen DS, et al. Asian-Pacific clinical practice  
535 guidelines on the management of hepatitis B: a 2015 update. *Hepatology* 2016;10:1-98.
- 536 3. Nguyen T, Thompson AJ, Bowden S, Croagh C, Bell S, Desmond PV, Levy M, et al. Hepatitis B surface  
537 antigen levels during the natural history of chronic hepatitis B: a perspective on Asia. *J Hepatol*  
538 2010;52:508-513.
- 539 4. Fattovich G, Bortolotti F, Donato F. Natural history of chronic hepatitis B: special emphasis on  
540 disease progression and prognostic factors. *J Hepatol* 2008;48:335-352.
- 541 5. Lemoine S, Cadoret A, El Mourabit H, Thabut D, Housset C. Origins and functions of liver  
542 myofibroblasts. *Biochim Biophys Acta* 2013;1832:948-954.
- 543 6. Zhang X, Lu W, Zheng Y, Wang W, Bai L, Chen L, Feng Y, et al. In situ analysis of intrahepatic  
544 virological events in chronic hepatitis B virus infection. *J Clin Invest* 2016;126:1079-1092.
- 545 7. Treere D. AgNOR staining and quantification. *Micron* 2000;31:127-131.
- 546 8. Vandesompele J, De Preter K, Pattyn F, Poppe B, Van Roy N, De Paepe A, Speleman F. Accurate  
547 normalization of real-time quantitative RT-PCR data by geometric averaging of multiple internal control  
548 genes. *Genome Biol* 2002;3:RESEARCH0034.
- 549 9. Hellemans J, Mortier G, De Paepe A, Speleman F, Vandesompele J. qBase relative quantification  
550 framework and software for management and automated analysis of real-time quantitative PCR data.  
551 *Genome Biol* 2007;8:R19.
- 552 10. Wang M, Gong Q, Zhang J, Chen L, Zhang Z, Lu L, Yu D, et al. Characterization of gene expression  
553 profiles in HBV-related liver fibrosis patients and identification of ITGBL1 as a key regulator of  
554 fibrogenesis. *Sci Rep* 2017;7:43446.
- 555 11. Zhou W, Ma Y, Zhang J, Hu J, Zhang M, Wang Y, Li Y, et al. Predictive model for inflammation grades  
556 of chronic hepatitis B: Large-scale analysis of clinical parameters and gene expressions. *Liver Int*  
557 2017;37:1632-1641.
- 558 12. Liu H, Li F, Zhang X, Yu J, Wang J, Jia J, Yu X, et al. Differentially Expressed Intrahepatic Genes  
559 Contribute to Control of Hepatitis B Virus Replication in the Inactive Carrier Phase. *J Infect Dis*  
560 2018;217:1044-1054.
- 561 13. Chisari FV, Klopchin K, Moriyama T, Pasquinelli C, Dunsford HA, Sell S, Pinkert CA, et al. Molecular  
562 pathogenesis of hepatocellular carcinoma in hepatitis B virus transgenic mice. *Cell* 1989;59:1145-1156.
- 563 14. Butler SL, Dong H, Cardona D, Jia M, Zheng R, Zhu H, Crawford JM, et al. The antigen for Hep Par 1  
564 antibody is the urea cycle enzyme carbamoyl phosphate synthetase 1. *Lab Invest* 2008;88:78-88.
- 565 15. Liu L, You Z, Yu H, Zhou L, Zhao H, Yan X, Li D, et al. Mechanotransduction-modulated fibrotic  
566 microniches reveal the contribution of angiogenesis in liver fibrosis. *Nat Mater* 2017;16:1252-1261.
- 567 16. Desai SS, Tung JC, Zhou VX, Grenert JP, Malato Y, Rezvani M, Espanol-Suner R, et al. Physiological  
568 ranges of matrix rigidity modulate primary mouse hepatocyte function in part through hepatocyte  
569 nuclear factor 4 alpha. *Hepatology* 2016;64:261-275.
- 570 17. Hadziyannis S, Gerber MA, Vissoulis C, Popper H. Cytoplasmic hepatitis B antigen in "ground-glass"  
571 hepatocytes of carriers. *Arch Pathol* 1973;96:327-330.
- 572 18. Chisari FV, Filippi P, Buras J, McLachlan A, Popper H, Pinkert CA, Palmiter RD, et al. Structural and  
573 pathological effects of synthesis of hepatitis B virus large envelope polypeptide in transgenic mice. *Proc*

- 574 Natl Acad Sci U S A 1987;84:6909-6913.
- 575 19. Koike K, Moriya K, Iino S, Yotsuyanagi H, Endo Y, Miyamura T, Kurokawa K. High-level expression of  
576 hepatitis B virus HBx gene and hepatocarcinogenesis in transgenic mice. *Hepatology* 1994;19:810-819.
- 577 20. Hsu CS, Liu CH, Wang CC, Tseng TC, Liu CJ, Chen CL, Chen PJ, et al. Impact of hepatitis B virus  
578 infection on metabolic profiles and modifying factors. *J Viral Hepat* 2012;19:e48-57.
- 579 21. Humphrey JD, Dufresne ER, Schwartz MA. Mechanotransduction and extracellular matrix  
580 homeostasis. *Nat Rev Mol Cell Biol* 2014;15:802-812.
- 581 22. Bertolotti A, Kennedy PT. The immune tolerant phase of chronic HBV infection: new perspectives  
582 on an old concept. *Cell Mol Immunol* 2015;12:258-263.
- 583 23. European Association for the Study of the Liver. Electronic address eee, European Association for  
584 the Study of the L. EASL 2017 Clinical Practice Guidelines on the management of hepatitis B virus  
585 infection. *J Hepatol* 2017;67:370-398.
- 586 24. Zhang ZQ, Zhang XN, Lu W, Wang YB, Weng QC, Feng YL. Distinct patterns of serum hepatitis B  
587 core-related antigen during the natural history of chronic hepatitis B. *BMC Gastroenterol* 2017;17:140.
- 588 25. Nguyen LH, Chao D, Lim JK, Ayoub W, Nguyen MH. Histologic changes in liver tissue from patients  
589 with chronic hepatitis B and minimal increases in levels of alanine aminotransferase: a meta-analysis  
590 and systematic review. *Clin Gastroenterol Hepatol* 2014;12:1262-1266.
- 591 26. Cheng Y, Zhu YO, Becht E, Aw P, Chen J, Poidinger M, de Sessions PF, et al. Multifactorial  
592 heterogeneity of virus-specific T cells and association with the progression of human chronic hepatitis  
593 B infection. *Sci Immunol* 2019;4.
- 594 27. Halpern KB, Shenhav R, Matcovitch-Natan O, Toth B, Lemze D, Golan M, Massasa EE, et al. Single-  
595 cell spatial reconstruction reveals global division of labour in the mammalian liver. *Nature*  
596 2017;542:352-356.
- 597 28. MacParland SA, Liu JC, Ma XZ, Innes BT, Bartczak AM, Gage BK, Manuel J, et al. Single cell RNA  
598 sequencing of human liver reveals distinct intrahepatic macrophage populations. *Nat Commun*  
599 2018;9:4383.

600

601

602

603

604

605

606



Figure 1

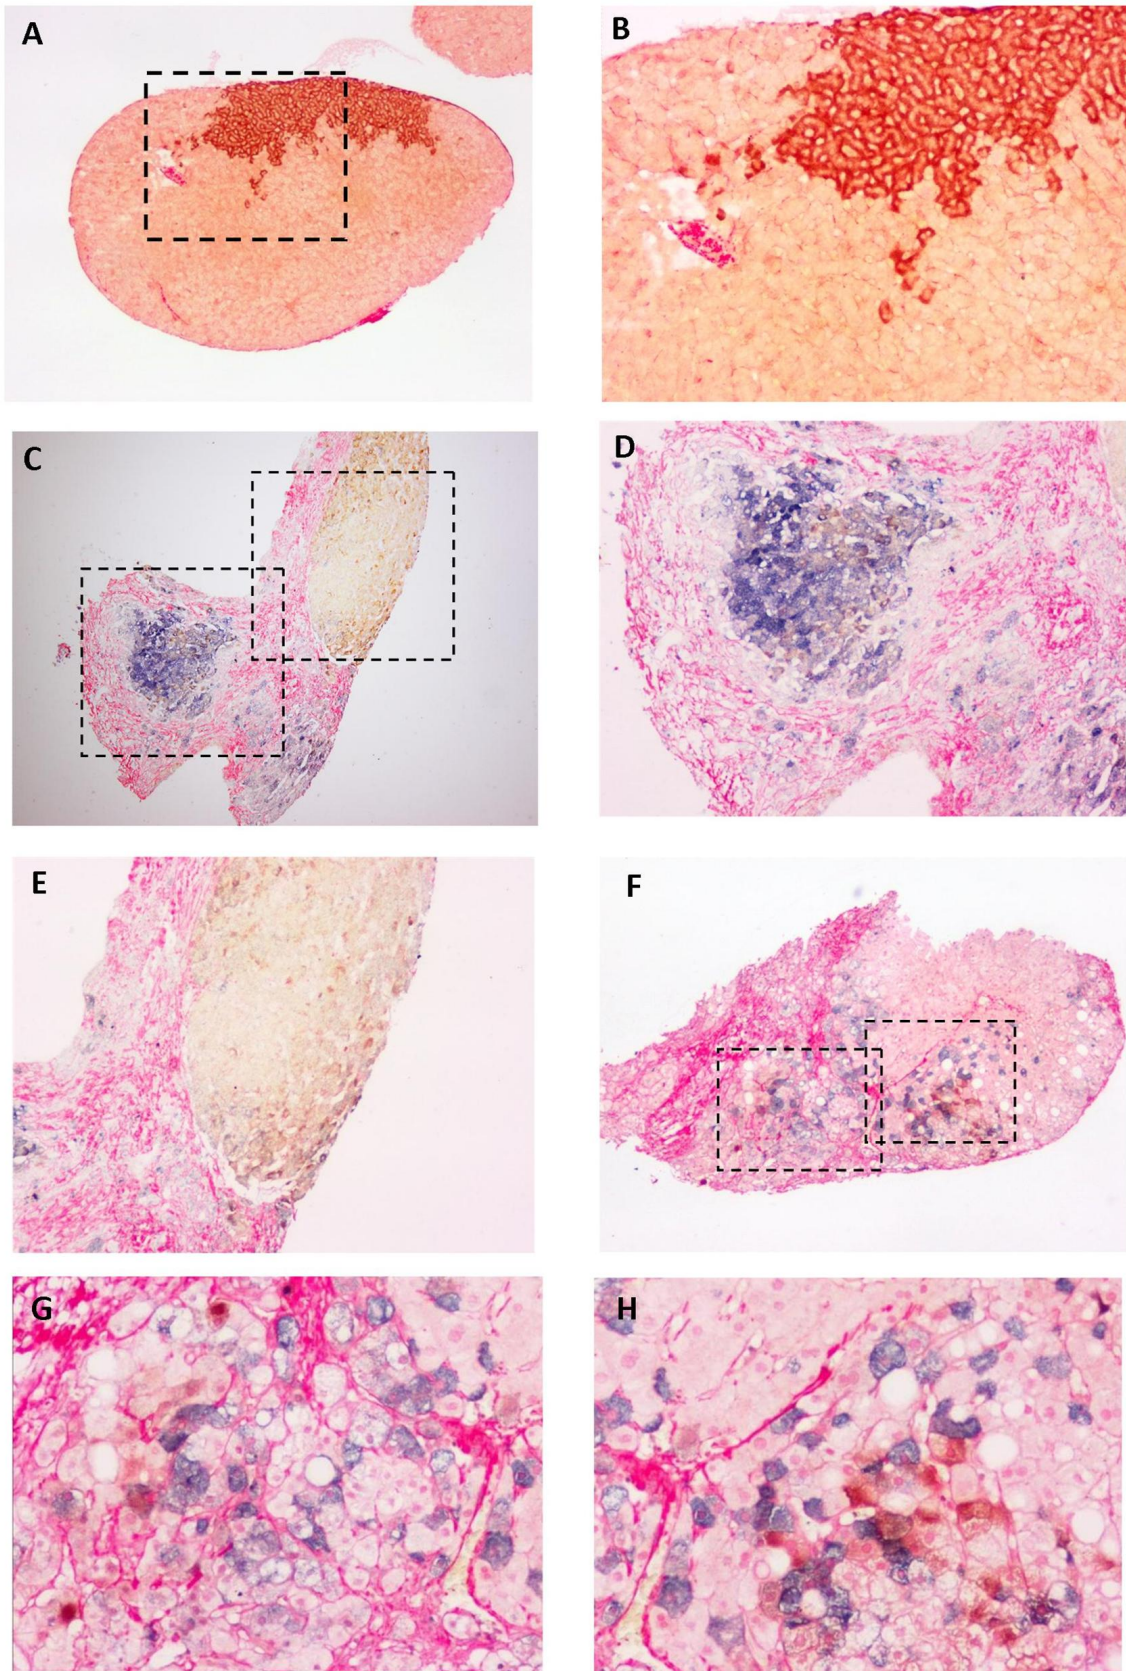

**Figure 1. Histological link between S-rich, DNA-rich stage transitions and the development of liver fibrosis.** Tissue sections from CHB patients were hybridized with HBV DNA specific probeset. After hybridization and signal amplification, NBT/BCIP (blue purple) was used for colorization followed by immunohistochemistry of HBsAg using DAB (brown) as chromogen. Sections were finally counterstained with Sirius red and mounted. B, D-E and G-H were magnifications of the rectangle area in image A, C and F respectively. Magnification, 100 $\times$  for A, C and F, 200 $\times$  for B, D E, G and H.



Figure 2

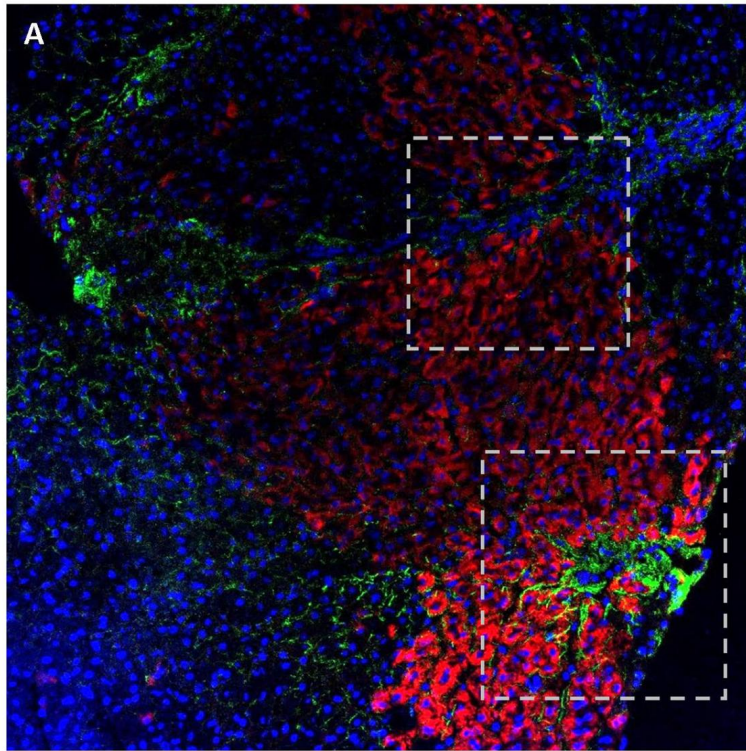

HBsAg Collagen I

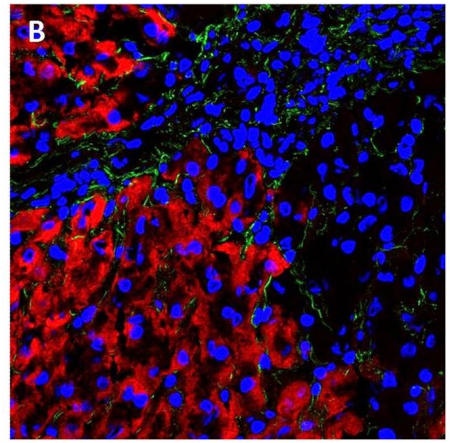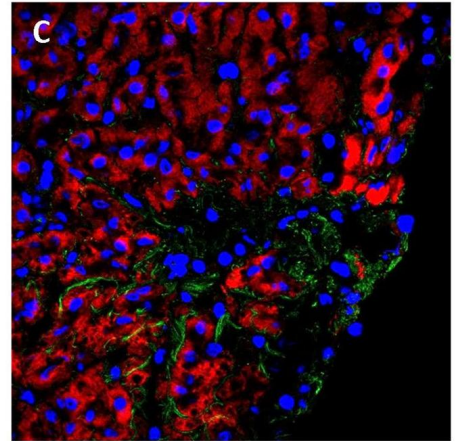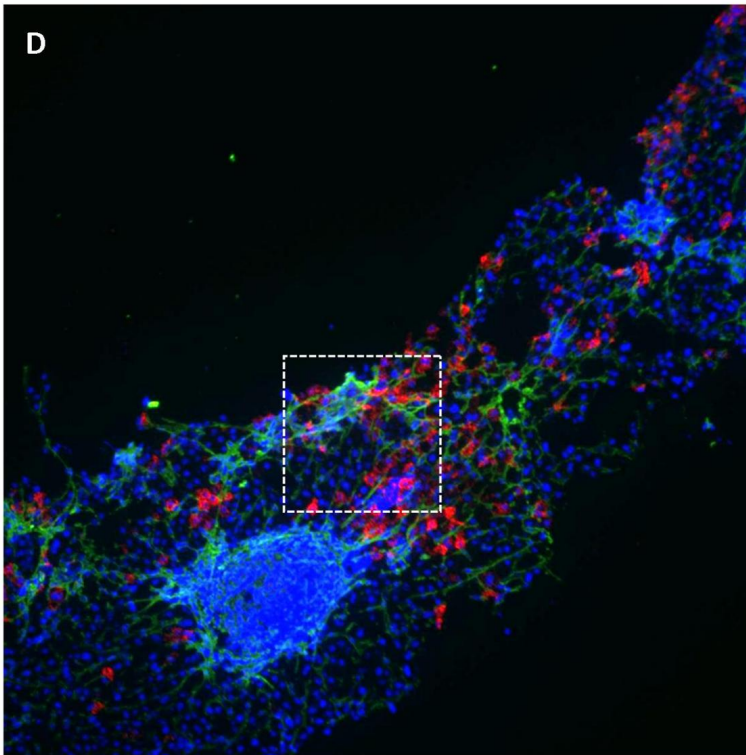

HBV DNA Collagen I

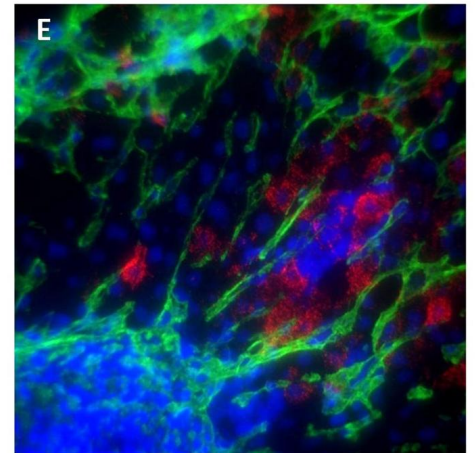

**Figure 2. Fluorescent imaging of HBsAg, HBV DNA in conjunction with immunostaining of type I collagen.** (A-C) Representative images of co-immunostaining of HBsAg (Alexa fluor 555, red) and type I collagen (Alexa fluor 448, green) followed by Hoechst 33342 counterstain (blue). Image B and C were magnifications of the rectangles in image A. (D-E) HBV DNA fluorescent in situ hybridization (red) was performed using fast red as substrate followed by immunostaining of type I collagen (green) and Hoechst 33342 counterstain (blue). Images were captured with confocal microscopy using 10 $\times$  (A, D) and 40 $\times$  (B, C and E) objective respectively.

Figure 3

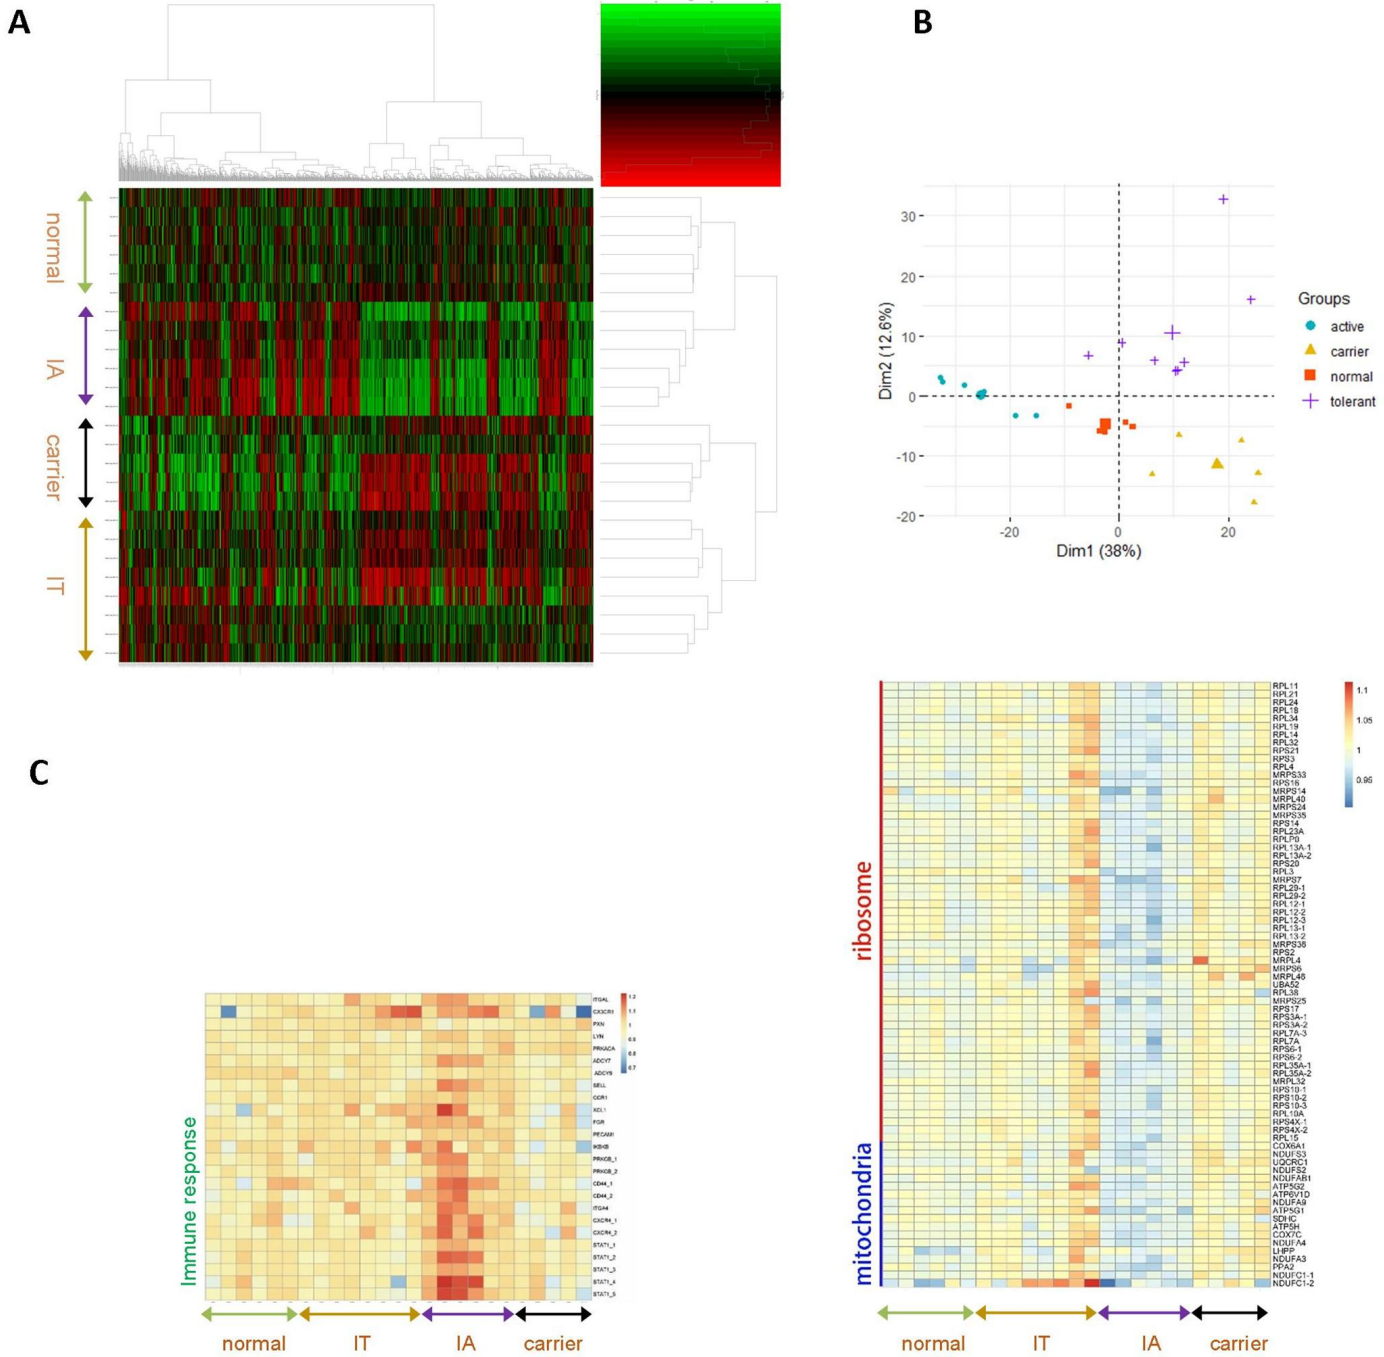

**Figure 3. Hepatic HBsAg accumulation induces ribosomal protein and oxidative phosphorylation gene expression.** (A) cDNA microarray analysis of samples classified into four types (normal, immune active (IA), carrier and immune tolerant (IT)) was performed. The expression profiles were processed with unsupervised hierarchical clustering and the differential genes were visualized with a heap map. (B) Principal component analysis (PCA) of the microarray data. (C) Heat maps of the differential genes classified in three functional groups (ribosomal proteins, oxidative phosphorylation and immune response related) in four types of samples.



Figure 4

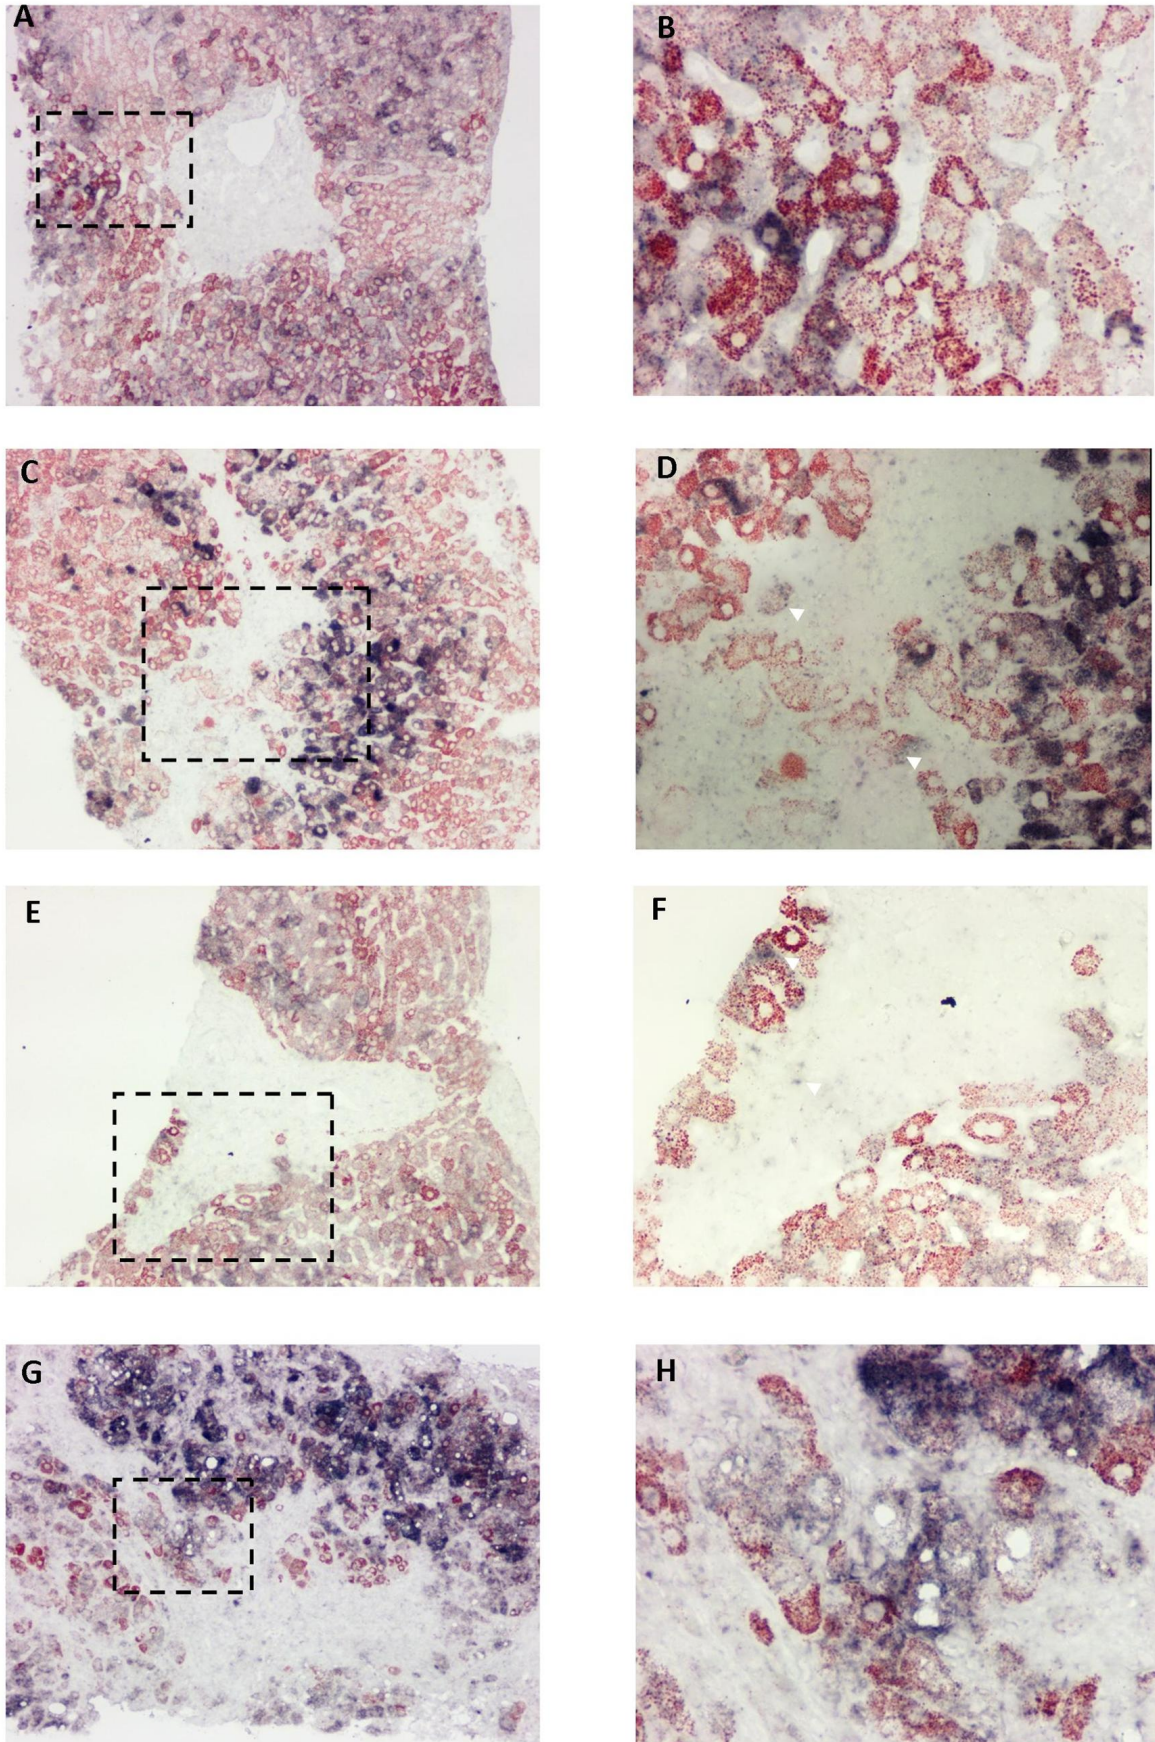

**Figure 4. Weakened expression of hepatocyte-specific protein in DNA-rich cells in a fibrosis dependent manner.** In situ hybridization was performed on FFPE sections from CHB patients and subsequently immunostained with anti-HepPar-1 and developed with AEC. Blue purple, HBV DNA, Red, HBsAg. Image B, D, F and H were magnifications of the rectangle area in image A, C, E and G respectively. Magnification, 200 $\times$  for A, C, E and G, 400 $\times$  for B, D, F, and H.



# Figure 5

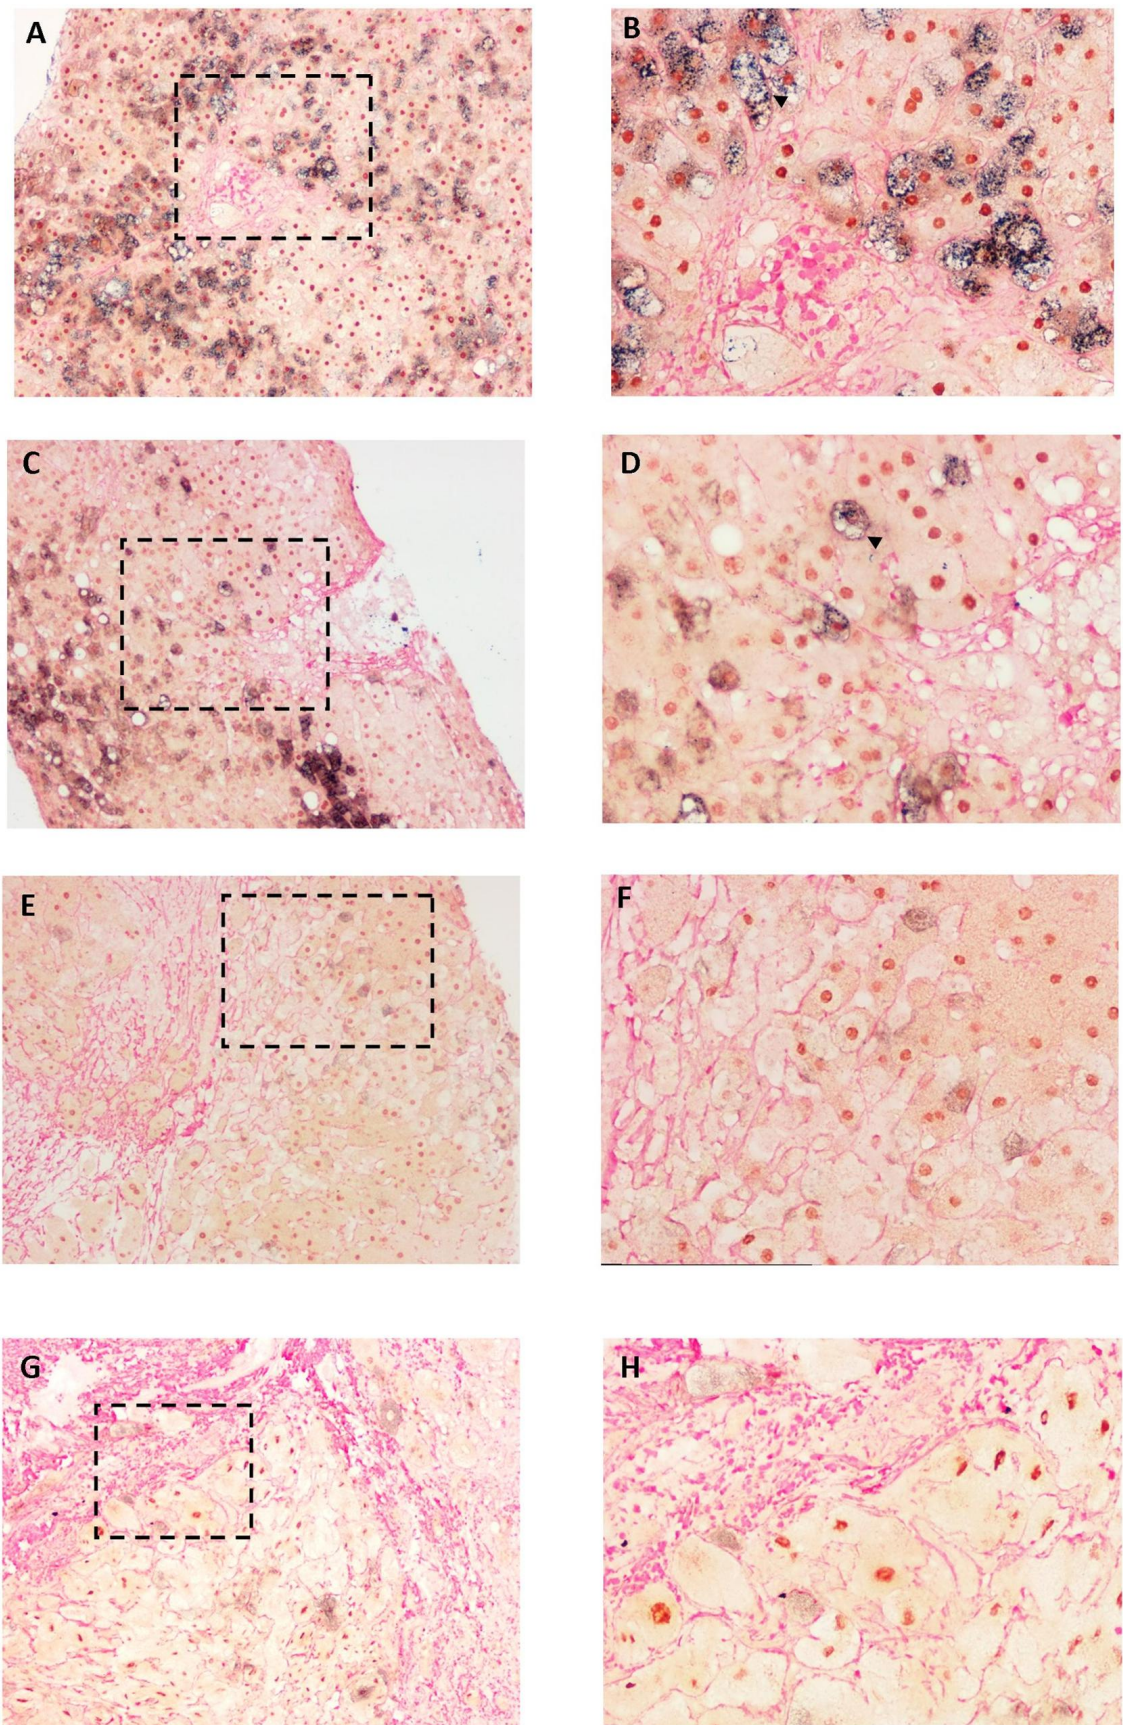

**Figure 5. Decreased expression of HNF4a in DNA-rich cells in a fibrosis dependent manner.** In situ hybridization of HBV DNA (blue purple) was performed on FFPE sections from CHB patients and subsequently immune-stained with anti-HNF4a and developed with DAB (brown). Slides were finally stained with Sirius red and mounted. Blue purple, HBV DNA, brown, HBsAg, red, Sirius red. Image B, D, F and H were magnifications of the rectangle area in image A, C, E and G respectively. Image B, D, F and H were magnifications of the rectangle area in image A, C, E and G respectively. Magnification, 200× for A, C, E and G, 400× for B, D, F, and H.



Figure 6

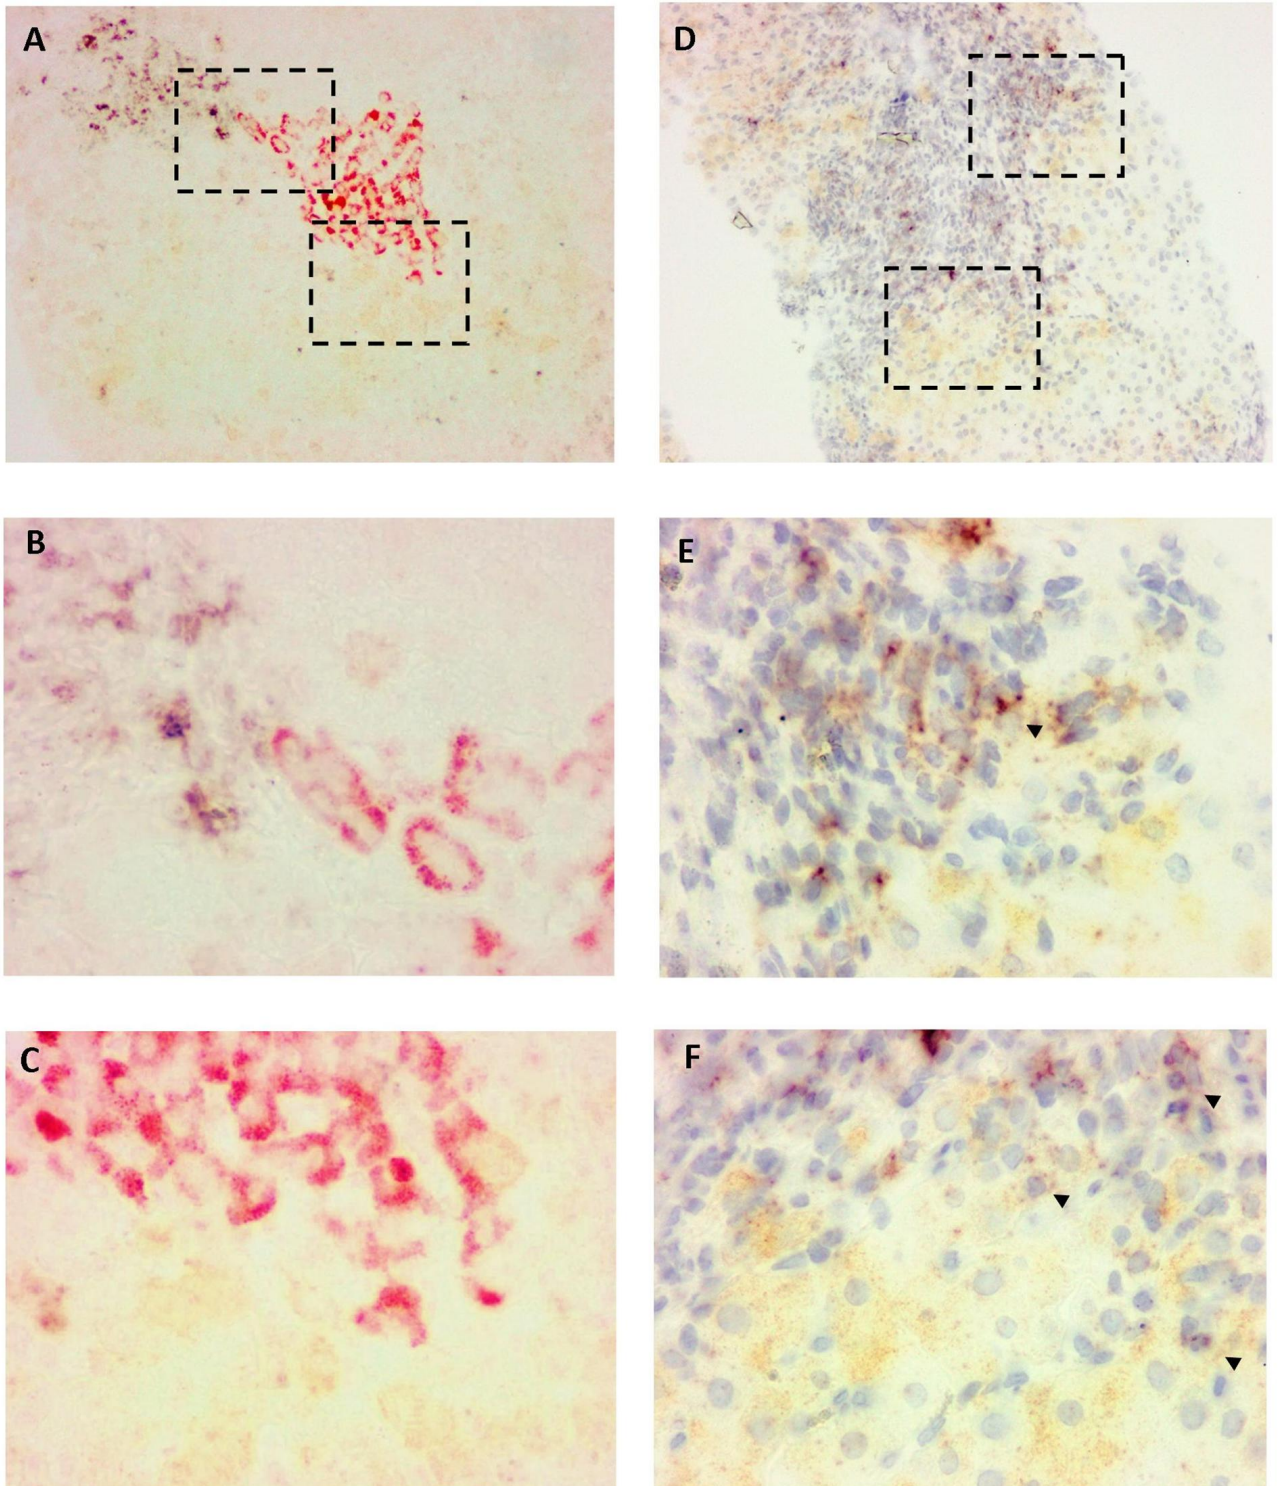

**Figure 6. The spatial relationship between hepatic inflammatory gene expression and HBV DNA.** Tissue sections from CHB patients were hybridized with probesets targeting HBV DNA (type 1) and IP-10 (type 6). After signal amplification, IP-10 was first visualized with NBT/BCIP (blue purple), after quenching 6-AP, sections were hybridized with 1-AP at 40 degree for 10min and developed with INT/BCIP (yellow). In image A-C, immunohistochemistry of HBsAg was performed afterwards and signal developed with AEC (red) whereas in image D-F, sections were counterstained with hematoxylin. Image B,C and E, F were magnifications of the rectangle areas in image A and D respectively. Magnification, 200 $\times$  for A and D, 400 $\times$  for B, C, E and F.

Figure 7

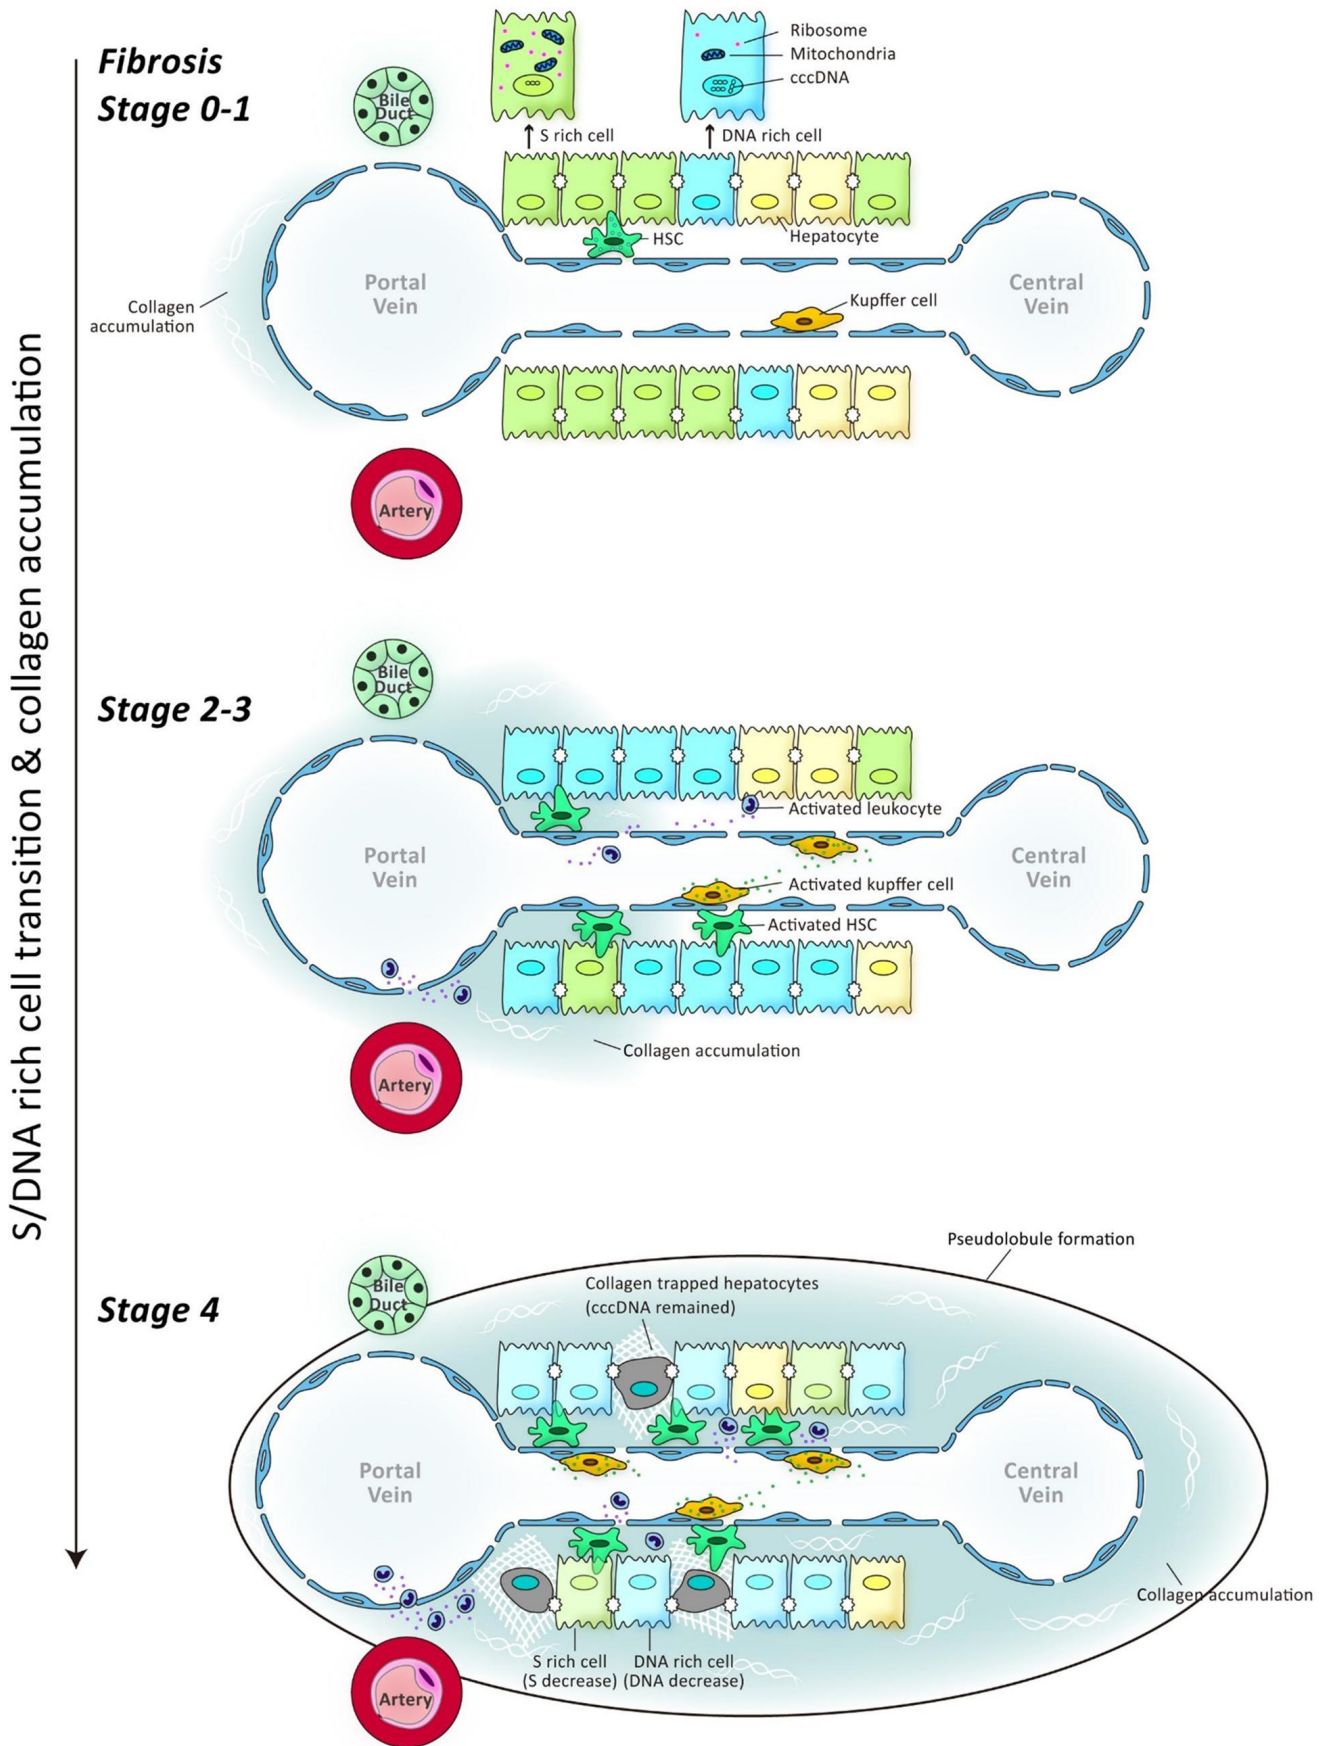

Figure 7. Schematic illustration of the updated model of HBV life-cycle in the histological context.
